# Supplementary material
Source: publisher site journal article supplement (https://neobiota.pensoft.net/article/29644/download/suppl/32/)
Supplement: Supplementary file 1

**SUPPLEMENTARY MATERIAL**

**Assessing the association between pathways of alien plant invaders and their impacts in protected areas**

Llewellyn C Foxcroft1, Dian Spear, Nicola J van Wilgen and Melodie A McGeoch

1Corresponding author: [Llewellyn.foxcroft@sanparks.org](mailto:Llewellyn.foxcroft@sanparks.org)

This file includes:

Supplementary Tables 2 to 6.

Supplementary Figures 1 and 2.

**Supplementary Table 2.** Spearman rank order correlation matrix of variables for pathways.

|  | Rivers | Roads, paths, trails, tracks | Contaminated equipment, material and soils | Ornamentals | Agriculture | Clothing | Food | Animal dispersed |
| --- | --- | --- | --- | --- | --- | --- | --- | --- |
| Rivers | 1 | 0.15 | 0.26 | 0.1 | -0.07 | -0.17 | -0.04 | -0.21 |
| Roads, paths, trails, tracks |  | 1 | 0.37 | -0.25 | 0.09 | -0.16 | 0.03 | 0.15 |
| Contaminated equipment, material and soils |  |  | 1 | -0.24 | 0.09 | 0.07 | 0.11 | 0.27 |
| Ornamentals |  |  |  | 1 | -0.32 | -0.09 | -0.12 | -0.23 |
| Agriculture |  |  |  |  | 1 | -0.04 | 0.08 | 0.09 |
| Clothing |  |  |  |  |  | 1 | -0.03 | 0.2 |
| Food |  |  |  |  |  |  | 1 | 0.09 |
| Animal dispersed |  |  |  |  |  |  |  | 1 |

**Supplementary Table 3.** Spearman rank order correlation matrix of variables for impacts.

|  | Fire properties | Geomorphology | Hydrological regimes | Nutrients, mineral dynamics | Light | pH, salinity, alkalinity | Physical structure | Facilitation | Succession, disturbance | Competition | Hybridization | Poison, allelopathy | Ecological interactions |
| --- | --- | --- | --- | --- | --- | --- | --- | --- | --- | --- | --- | --- | --- |
| Fire properties | 1 | 0.41 | 0.34 | 0.23 | 0.33 | 0.55 | 0.23 | -0.09 | 0.46 | 0.13 | -0.12 | -0.2 | 0.08 |
| Geomorphology |  | 1 | 0.59 | 0.35 | 0.3 | 0.35 | 0.39 | -0.11 | 0.41 | 0.16 | 0.02 | -0.14 | -0.14 |
| Hydrological regimes |  |  | 1 | 0.52 | 0.32 | 0.44 | 0.34 | -0.05 | 0.2 | 0.07 | 0.04 | -0.22 | -0.12 |
| Nutrients, mineral dynamics |  |  |  | 1 | 0.32 | 0.57 | 0.17 | 0.09 | 0.05 | 0.02 | 0.09 | -0.07 | 0.06 |
| Light |  |  |  |  | 1 | 0.29 | 0.29 | 0 | 0.39 | 0.15 | 0.14 | -0.09 | -0.04 |
| pH, salinity, alkalinity |  |  |  |  |  | 1 | 0.25 | -0.07 | 0.18 | 0.1 | 0.01 | -0.15 | -0.09 |
| Physical structure |  |  |  |  |  |  | 1 | 0.09 | 0.14 | -0.05 | 0.12 | -0.36 | -0.02 |
| Facilitation |  |  |  |  |  |  |  | 1 | 0.09 | -0.21 | -0.03 | 0.01 | 0.12 |
| Succession, disturbance |  |  |  |  |  |  |  |  | 1 | 0.16 | 0.09 | -0.07 | 0.11 |
| Competition |  |  |  |  |  |  |  |  |  | 1 | 0.04 | 0.07 | 0.07 |
| Hybridization |  |  |  |  |  |  |  |  |  |  | 1 | -0.13 | 0.07 |
| Poison, allelopathy |  |  |  |  |  |  |  |  |  |  |  | 1 | 0.11 |
| Ecological interactions |  |  |  |  |  |  |  |  |  |  |  |  | 1 |

| **Life form** | **Total #** | **% total spp.** |
| --- | --- | --- |
| Tree | 52 | 37.4 |
| Tree-shrub | 24 | 17.3 |
| Shrub | 16 | 11.5 |
| Succulent | 12 | 8.6 |
| Herb | 11 | 7.9 |
| Climber | 9 | 6.5 |
| Aquatic | 7 | 5.0 |
| Grass | 7 | 5.0 |
| Fern | 1 | 0.7 |

**Supplementary Table 4.** Total count and percentage of species per life form

| **Biome** | **Total #** | **% total spp.** |
| --- | --- | --- |
| Fynbos | 108 | 77.7 |
| Savanna | 67 | 48.2 |
| Forest | 63 | 45.3 |
| Thicket | 51 | 36.7 |
| Grassland | 44 | 31.7 |
| Nama Karoo | 28 | 20.1 |
| Arid Savanna | 13 | 9.4 |
| Succulent Karoo | 8 | 5.8 |

**Supplementary Table 5.** Total count and percentage of species per biome.

**Supplementary Table 6.** Total count and percentage of species per park.

| **Park** | **Total #** | **% total spp.** |
| --- | --- | --- |
| Table Mountain | 83 | 59.7 |
| Garden Route | 62 | 44.6 |
| Kruger | 62 | 44.6 |
| Golden Gate Highlands | 39 | 28.1 |
| Agulhas | 36 | 25.9 |
| Addo Elephant | 31 | 22.3 |
| Camdeboo | 28 | 20.1 |
| Bontebok | 17 | 12.2 |
| Mountain Zebra | 17 | 12.2 |
| Mapungubwe | 16 | 11.5 |
| Mokala | 15 | 10.8 |
| Karoo | 14 | 10.1 |
| Marakele | 11 | 7.9 |
| Tankwa | 11 | 7.9 |
| Augrabies Falls | 9 | 6.5 |
| Namaqua | 8 | 5.8 |
| West Coast | 7 | 5.0 |
| Kalahari Gemsbok | 2 | 1.4 |
| Richtersveld | 2 | 1.4 |

**Supplementary Table 6.** Total count and percentage of species per pathway and life form.

|  | **Ornamentals** | | **Rivers** | | **Animal dispersed** | | **Roads, paths, trails, tracks** | | **Agriculture** | | **Contaminated equipment, material and soils** | | **Clothing** | | **Food** | |
| --- | --- | --- | --- | --- | --- | --- | --- | --- | --- | --- | --- | --- | --- | --- | --- | --- |
| Total # | Total # | % total spp. | Total # | % total spp. | Total # | % total spp. | Total # | % total spp. | Total # | % total spp. | Total # | % total spp. | Total # | % total spp. | Total # | % total spp. |
| 139 | 109 | 78 | 87 | 63 | 67 | 48 | 56 | 40 | 40 | 29 | 33 | 24 | 5 | 4 | 4 | 3 |
|  |  |  |  |  |  |  |  |  |  |  |  |  |  |  |  |  |
| Aquatic | 7 | 6.4 | 7 | 8.0 | 1 | 1.5 | 0 | 0.0 | 0 | 0.0 | 2 | 6.1 | 0 | 0.0 | 0 | 0.0 |
| Climber | 7 | 6.4 | 4 | 4.6 | 2 | 3.0 | 0 | 0.0 | 1 | 2.5 | 1 | 3.0 | 0 | 0.0 | 0 | 0.0 |
| Fern | 1 | 0.9 | 0 | 0.0 | 0 | 0.0 | 0 | 0.0 | 0 | 0.0 | 0 | 0.0 | 0 | 0.0 | 0 | 0.0 |
| Grass | 5 | 4.6 | 5 | 5.7 | 3 | 4.5 | 5 | 8.9 | 2 | 5.0 | 3 | 9.1 | 1 | 20.0 | 0 | 0.0 |
| Herb | 9 | 8.3 | 7 | 8.0 | 2 | 3.0 | 3 | 5.4 | 1 | 2.5 | 3 | 9.1 | 1 | 20.0 | 0 | 0.0 |
| Shrub | 13 | 11.9 | 9 | 10.3 | 9 | 13.4 | 10 | 17.9 | 2 | 5.0 | 4 | 12.1 | 0 | 0.0 | 1 | 25.0 |
| Succulent | 11 | 10.1 | 1 | 1.1 | 9 | 13.4 | 0 | 0.0 | 1 | 2.5 | 0 | 0.0 | 2 | 40.0 | 1 | 25.0 |
| Tree | 38 | 34.9 | 39 | 44.8 | 27 | 40.3 | 29 | 51.8 | 29 | 72.5 | 12 | 36.4 | 0 | 0.0 | 1 | 25.0 |
| Tree-shrub | 18 | 16.5 | 15 | 17.2 | 14 | 20.9 | 9 | 16.1 | 4 | 10.0 | 8 | 24.2 | 1 | 20.0 | 1 | 25.0 |

**Supplementary Table 7.** Total count and percentage of species per impact type and life form.

|  | **Competition** | | **Physical structure** | | **Light** | | **Hydrological regimes** | | **Nutrients / mineral dynamics** | | **Succession / disturbance** | | **Geomorphology** | | **Poison / allelopathy** | | **Fire properties** | | **pH / salinity / alkalinity** | | **Ecological interactions** | | **Hybridization** | | **Facilitation** | |
| --- | --- | --- | --- | --- | --- | --- | --- | --- | --- | --- | --- | --- | --- | --- | --- | --- | --- | --- | --- | --- | --- | --- | --- | --- | --- | --- |
| **Total #** | **Total #** | **% total spp.** | **Total #** | **% total spp.** | **Total #** | **% total spp.** | **Total #** | **% total spp.** | **Total #** | **% total spp.** | **Total #** | **% total spp.** | **Total #** | **% total spp.** | **Total #** | **% total spp.** | **Total #** | **% total spp.** | **Total #** | **% total spp.** | **Total #** | **% total spp.** | **Total #** | **% total spp.** | **Total #** | **% total spp.** |
| 139 | 133 | 95.7 | 101 | 72.7 | 93 | 66.9 | 68 | 48.9 | 52 | 37.4 | 52 | 37.4 | 50 | 36.0 | 43 | 30.9 | 38 | 27.3 | 25 | 18.0 | 13 | 9.4 | 5 | 3.6 | 3 | 2.2 |
| Unknown | 6 | 4.3 | 18 | 12.9 | 14 | 10.1 | 18 | 12.9 | 79 | 56.8 | 19 | 13.7 | 47 | 33.8 | 1 | 0.7 | 16 | 11.5 | 103 | 74.1 | 75 | 54.0 | 4 | 2.9 | 22 | 15.8 |
|  |  |  |  |  |  |  |  |  |  |  |  |  |  |  |  |  |  |  |  |  |  |  |  |  |  |  |
| Aquatic | 7 | 5.3 | 6 | 5.9 | 7 | 7.5 | 7 | 10.3 | 7 | 13.5 | 2 | 3.8 | 4 | 8.0 | 1 | 2.3 | 0 | 0 | 1 | 4.0 | 2 | 15.4 | 1 | 20.0 | 0 | 0 |
| Climber | 9 | 6.8 | 9 | 8.9 | 8 | 8.6 | 0 | 0 | 1 | 1.9 | 2 | 3.8 | 0 | 0 | 4 | 9.3 | 0 | 0 | 0 | 0 | 2 | 15.4 | 0 | 0 | 1 | 33.3 |
| Fern | 1 | 0.8 | 0 | 0.0 | 0 | 0 | 0 | 0 | 0 | 0 | 0 | 0 | 0 | 0 | 0 | 0 | 0 | 0 | 0 | 0 | 0 | 0.0 | 0 | 0 | 0 | 0 |
| Grass | 7 | 5.3 | 5 | 5.0 | 3 | 3.2 | 4 | 5.9 | 2 | 3.8 | 3 | 5.8 | 4 | 8.0 | 1 | 2.3 | 4 | 10.5 | 0 | 0 | 2 | 15.4 | 0 | 0 | 0 | 0 |
| Herb | 11 | 8.3 | 5 | 5.0 | 9 | 9.7 | 2 | 2.9 | 0 | 0.0 | 7 | 13.5 | 0 | 0 | 2 | 4.7 | 2 | 5.3 | 1 | 4.0 | 2 | 15.4 | 0 | 0 | 0 | 0 |
| Shrub | 14 | 10.5 | 7 | 6.9 | 10 | 10.8 | 1 | 1.5 | 4 | 7.7 | 6 | 11.5 | 2 | 4.0 | 8 | 18.6 | 2 | 5.3 | 1 | 4.0 | 2 | 15.4 | 2 | 40.0 | 0 | 0 |
| Succulent | 12 | 9.0 | 11 | 10.9 | 2 | 2.2 | 0 | 0 | 0 | 0 | 1 | 1.9 | 1 | 2.0 | 1 | 2.3 | 1 | 2.6 | 0 | 0 | 0 | 0 | 0 | 0 | 0 | 0 |
| Tree | 49 | 36.8 | 39 | 38.6 | 39 | 41.9 | 41 | 60.3 | 27 | 51.9 | 21 | 40.4 | 27 | 54.0 | 17 | 39.5 | 22 | 57.9 | 17 | 68.0 | 1 | 7.7 | 1 | 20.0 | 1 | 33.3 |
| Tree-shrub | 23 | 17.3 | 19 | 18.8 | 15 | 16.1 | 13 | 19.1 | 11 | 21.2 | 10 | 19.2 | 12 | 24.0 | 9 | 20.9 | 7 | 18.4 | 5 | 20.0 | 2 | 15.4 | 1 | 20.0 | 1 | 33.3 |

**Supplementary Figure 1.** Cladogram of plant introduction pathways, based on similarities of pathways, with species names included.

Mean number and type of pathways have been calculated per clade (Groups a-c). Sub-groups (d) include 25 species (Mean: 4.5 pathways/species; 100% contaminants; 92% rivers; 84%roads; 80% ornamentals), (e) include 20 species (Mean: 2.9 pathways/species; 100% roads; 85% ornamentals), (f) include 29 species (Mean: 2.5 pathways/species; 96% ornamentals; 90% animals), (g) include 48 species (Mean: 2.1 pathways/species; 91% ornamentals). The vertical black bars indicate clustering of species, whereas all other species are scattered across the groups, (h) *Acacia podalyriifolia*, *Acacia baileyana*, *Acacia elata*, *Acacia implexa*, *Acacia longifolia*, (i) *Pinus pinaster*, *Pinus radiata*, *Pinus roxburghii*, *Pinus taeda*, *Pinus halepensis*, *Pinus patula*.

**Supplementary Figure 2.** Cladogram of plant impacts, based on similarities of impact types, with species names included.

Mean number and type of impacts have been calculated per clade (Groups a-c). Sub-groups include (d) 24 species (Mean: 3 impacts/species; 100% competition; physical structure 100%), (e) 11 species (Mean: 4.6 impacts/species; 100% competition; physical structure 100%; 82% hydrological), (f) 32 species (Mean: 7.9 impacts/species; competition, physical structure, light, hydrology, fire >90%), (g) 22 species (Mean: 6.4 impacts/species; competition, physical structure, light, hydrology >90%). The vertical black bars indicate clustering of species, whereas all other species are scattered across the groups, (h) *Cereus jamacaru*, *Echinopsis spachiana*, *Opuntia aurantiaca*, *Opuntia ficus-indica*, *Opuntia humifusa*, *Cylindropuntia imbricata*, *Cylindropuntia fulgida*, *Opuntia stricta*, (i) *Eucalyptus cladocalyx*, *Eucalyptus lehmannii*, *Eucalyptus sideroxylon*, *Eucalyptus camaldulensis*, *Eucalyptus diversicolor*, (j) *Pinus radiata*, *Pinus roxburghii*, *Pinus* *taeda*, *Pinus halepensis*, *Pinus patula*, *Pinus canariensis*, *Pinus pinaster*, (k) *Acacia dealbata*, *Acacia mearnsii*, *Acacia melanoxylon*, *Acacia paradoxa*, *Acacia podalyriifolia*, *Acacia pycnantha*, *Acacia saligna*, *Acacia baileyana*, *Acacia cyclops*, *Acacia decurrens*, *Acacia elata*, *Acacia implexa*, *Acacia longifolia*.
